# Supplementary material for: Synthesis of ultrafine Co/CoO nanoparticle-embedded N-doped carbon framework magnetic material and application for 4-nitrophenol catalytic reduction
Source: Royal Society of Chemistry journal article supplement (doi:10.1039/d1nj02921e), 2021-01-01
Supplement: d1nj02921e1.pdf [file d1nj02921e1.pdf]

# Supporting Information for

## Synthesis of ultrafine Co/CoO nanoparticles embedded in N-doped carbon framework magnetic material and application for 4-nitrophenol catalytic reduction

Dongsheng Wang,<sup>ab</sup> Liang Xu,<sup>a</sup> Fanming Zeng,<sup>\*ab</sup> Xiaoli Hu,<sup>ab</sup> Bailing Liu,<sup>\*ab</sup> Chun Li,<sup>a</sup> Zhongmin Su<sup>\*abc</sup> and Jing Sun<sup>ab</sup>

<sup>a</sup>School of Materials Science and Engineering, Changchun University of Science and Technology, Changchun 130022, China. Email: zengfm@cust.edu.cn

<sup>b</sup>Jilin Provincial Science and Technology Innovation Center of Optical Materials and Chemistry, Changchun. 130022, China. Email: liubl@cust.edu.cn

<sup>c</sup>Joint Sino-Russian Laboratory of Optical Materials and Chemistry, Changchun 130022, China. Email: zmsu@nenu.edu.cn

### Contents

#### 1. Materials and measurements

#### 2. Synthesis and methods

#### 3. Characterizations and results

**Table S1** Crystallographic data of **Co-MOF**.

**Fig. S1** (a) The coordination environment of Co (II); (b) 3D structure diagram of **Co-MOF**; (c) The connection between the 2D planes of **Co-MOF**; (d) Topological diagram of **Co-MOF**.

**Fig. S2** FTIR spectra (a), TGA curves pattern (b) and experimental and simulation XRD of **Co-MOF**.

**Fig. S3** XPS analysis of **Co/CoO@NC**: (a) full spectra; High-resolution spectrum of (b) C 1s, (c) Co 2p and (d) N 1s.

**Fig. S4** (a) Absorption peak of 4-NP (black) and after adding NaBH<sub>4</sub> (red); (b) Absorption peak of 4-AP after adding catalyst. UV-vis spectrum with only (c) 0.1 mg and (d) 1 mg catalyst added.

**Table S2** Comparison of 4-NP reduction rate between **Co/CoO@NC** and some precious metal catalysts.

**Fig. S5** Magnetic hysteresis loop of **Co/CoO@NC** (298 K).

**Fig. S6** (a) XRD curve, (b) TEM picture and (c) EDX elemental mapping of **Co/CoO@NC** after five cycles experiment.

## 1. Materials and measurements

All chemicals are from commercial sources and used directly without purification. 4-nitrophenol (4-NP), sodium borohydride ( $\text{NaBH}_4$ ), 2,4,6-Tri(4-pyridyl)-1,3,5-triazine (TPT), 1,4-naphthalenedicarboxylate (1,4-ndc) and  $\text{Co}(\text{NO}_3)_2 \cdot 6\text{H}_2\text{O}$  were purchased from Energy Chemical. N,N-Dimethylacetamide (DMA) was obtained from Tokyo Chemical Industry.

The X-ray single crystal diffraction data was collected on a Bruker SMART APEX II single crystal instrument using a Mo target ( $K\alpha$ ,  $\lambda = 0.71073 \text{ \AA}$ ) at room temperature. Thermogravimetric analysis (TGA) was performed on the TA STD-Q600 thermal analyzer. The morphology of Co/CoO@NC was observed using a JEM-2100F field emission projection microscope with an accelerating voltage of 200 kV, and the phase composition was studied by X-ray diffraction (XRD) using Bruker D8 diffractometer. The specific surface area of Co/CoO@NC was calculated by the Brunauer-Emmett-Teller (BET) method, and the pore size distribution was evaluated using the Barrett-Joyner-Halenda (BJH) model. The elemental composition of Co/CoO@NC was analyzed by X-ray photoelectron spectroscopy (XPS) of KRATOS Analytical. Monitor the progress of the catalytic reduction reaction on the JASCO V-770 UV-Vis spectrometer.

## 2. Synthesis and Methods

**Synthesis of Co-MOF.** The mixture of TPT (10.4 mg, 0.03 mmol), 1,4-ndc (10.8 mg, 0.05 mmol) and  $\text{Co}(\text{NO}_3)_2 \cdot 6\text{H}_2\text{O}$  (29.1 mg, 0.1 mmol) were dissolved in 6 mL DMA- $\text{H}_2\text{O}$  (1:1, v/v) mixed solvent and placed in a 25 mL polytetrafluoroethylene autoclave. After heating at 100 °C for 3 days, the reactor is naturally cooled to room temperature to obtain brown crystal, and the resulting product was washed 3 times with methanol. Elemental analysis: anal. calcd for  $\text{C}_{58}\text{H}_{25}\text{N}_7\text{O}_{16}\text{Co}_3$ : C 55.59; H 2.00; N 7.83%. Found: C 55.36; H 1.87; N 7.54%. IR (KBr,  $\text{cm}^{-1}$ ): 980.48 (w), 1211.78 (w), 1255.98 (w), 1616.20 (w), 507.09 (m), 988.73 (m), 1050.83 (m), 1157.73 (m), 1318.08 (m), 1576.68 (m), 639.74 (s), 795.37 (s), 1371.53 (s), 1511.44 (s). CCDC-2082159 (Co-MOF) contains the supplementary crystallographic data for this paper.

**Synthesis of Co/CoO@NC.** Put the **Co-MOF** into the alumina crucible, and then move them to the tube furnace. The heat treatment was carried out in a flowing nitrogen atmosphere with the heating rate is 5 °C/min, and keep at 550 °C for 5 h. At last, it is naturally cooled to room temperature to obtain Co/CoO@NC hybrid material.

### Catalytic reduction of 4-NP.

Add 0.2 mL 4-NP solution (2.5 mM), 2.5 mL distilled water, and 0.2 mL freshly prepared NaBH<sub>4</sub> aqueous solution (0.2 M) to the cuvette in order. Move the cuvette into JASCO V-770 UV-Vis spectrometer and set the test temperature. Drop 0.1 mL catalyst/water dispersions of various concentrations to start the reaction after the temperature stabilizes, and record the characteristic absorbance changes at different times.

### 3. Characterizations and results

**Table S1** Crystallographic data of **Co-MOF**.

| Compound                          | Co-MOF                                                                         |
|-----------------------------------|--------------------------------------------------------------------------------|
| Empirical formula                 | C <sub>57</sub> H <sub>12</sub> Co <sub>3</sub> N <sub>6</sub> O <sub>13</sub> |
| Formula weight                    | 1165.56                                                                        |
| Temperature/K                     | 295.15                                                                         |
| Crystal system                    | hexagonal                                                                      |
| Space group                       | P6 <sub>3</sub> /mmc                                                           |
| a/Å                               | 16.866(7)                                                                      |
| b/Å                               | 16.866(7)                                                                      |
| c/Å                               | 15.377(6)                                                                      |
| α/°                               | 90                                                                             |
| β/°                               | 90                                                                             |
| γ/°                               | 120                                                                            |
| Volume/Å <sup>3</sup>             | 3788(3)                                                                        |
| Z                                 | 1.99992                                                                        |
| F(000)                            | 1162.0                                                                         |
| 2θ range for data collection/°    | 4.83 to 50.2                                                                   |
| Index ranges                      | -20 ≤ h ≤ 19, -19 ≤ k ≤ 20, -18 ≤ l ≤ 18                                       |
| Reflections collected             | 26343                                                                          |
| Data/restraints/parameters        | 1300/126/116                                                                   |
| Independent reflections           | R <sub>int</sub> = 0.0423, R <sub>sigma</sub> = 0.0156                         |
| Goodness-of-fit on F <sup>2</sup> | 1.150                                                                          |
| Final R indexes [I ≥ 2σ (I)]      | R <sub>1</sub> = 0.0710, wR <sub>2</sub> = 0.2025                              |
| Final R indexes [all data]        | R <sub>1</sub> = 0.0758, wR <sub>2</sub> = 0.2085                              |

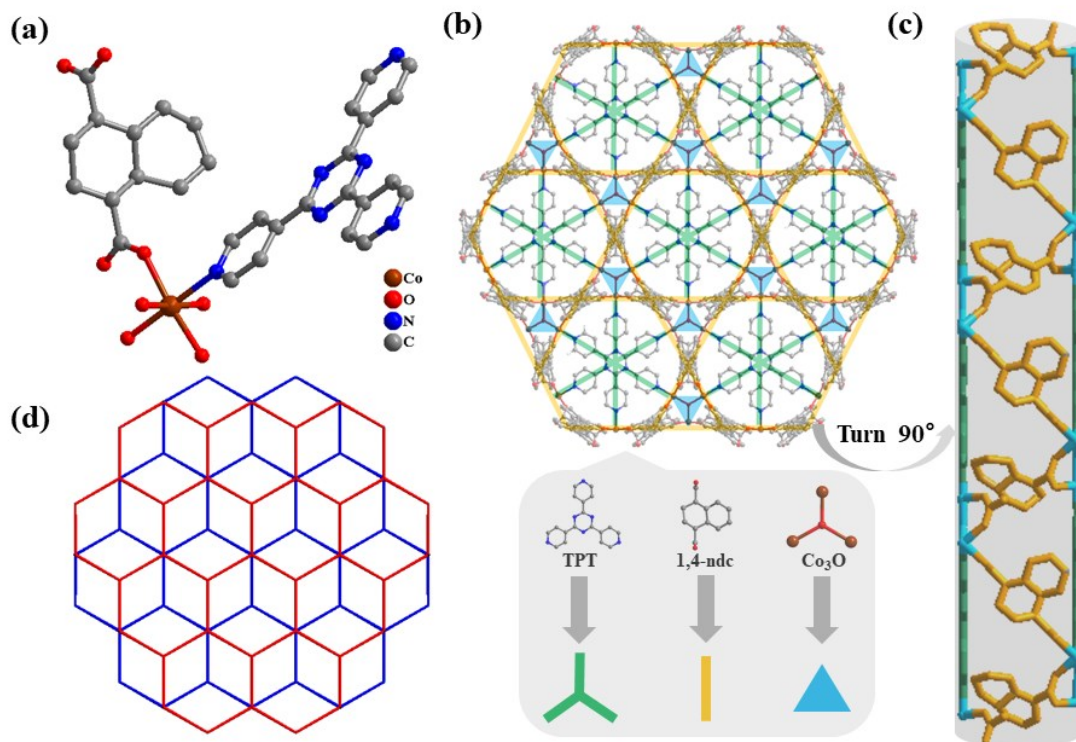

**Fig. S1** (a) The coordination environment of Co (II); (b) 3D structure diagram of **Co-MOF**; (c) The connection between the 2D planes of **Co-MOF**; (d) Topological diagram of **Co-MOF**.

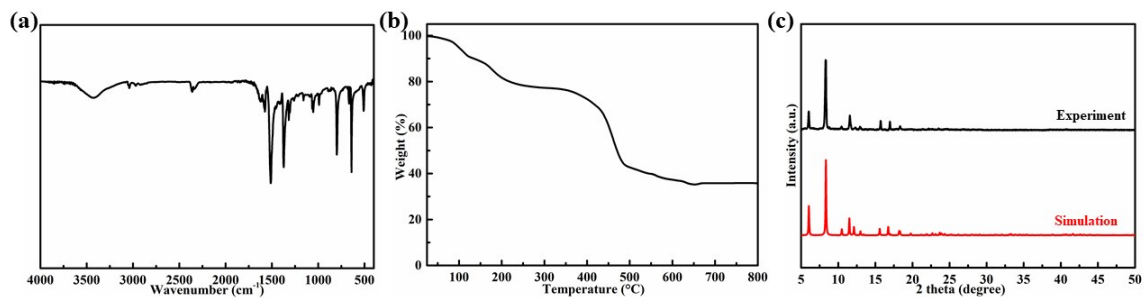

**Fig. S2** (a) FTIR spectra, (b) TGA curves pattern and (c) experimental and simulation XRD of **Co-MOF**.

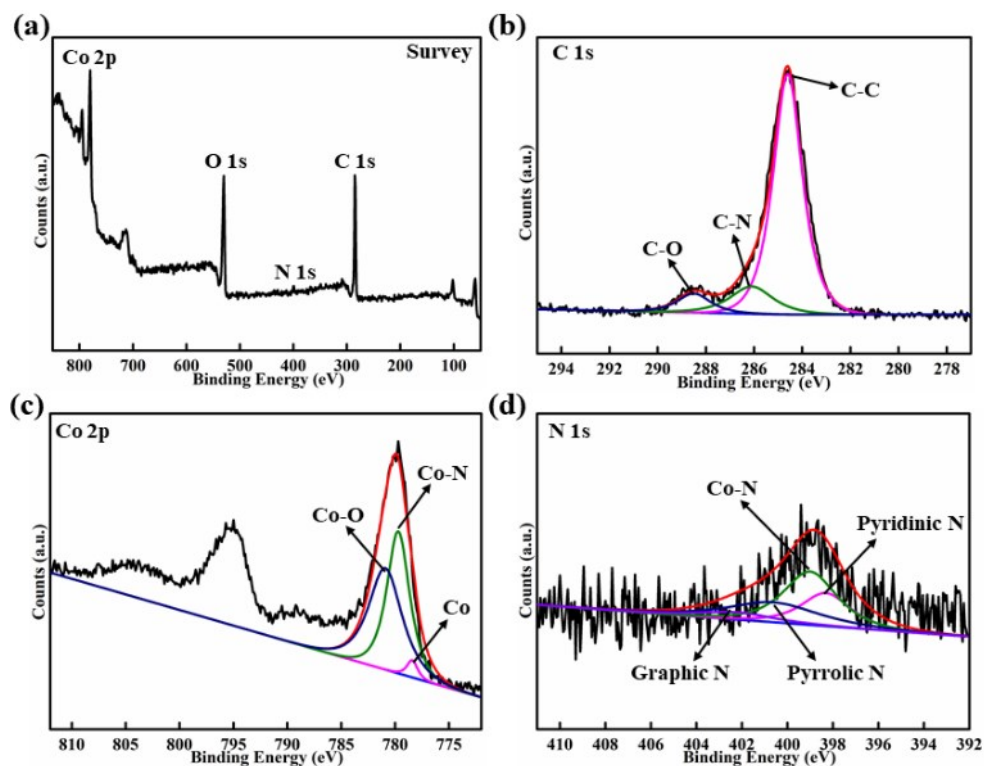

**Fig. S3** XPS analysis of Co/CoO@NC: (a) full spectra; High-resolution spectrum of (b) C 1s, (c) Co 2p and (d) N 1s.

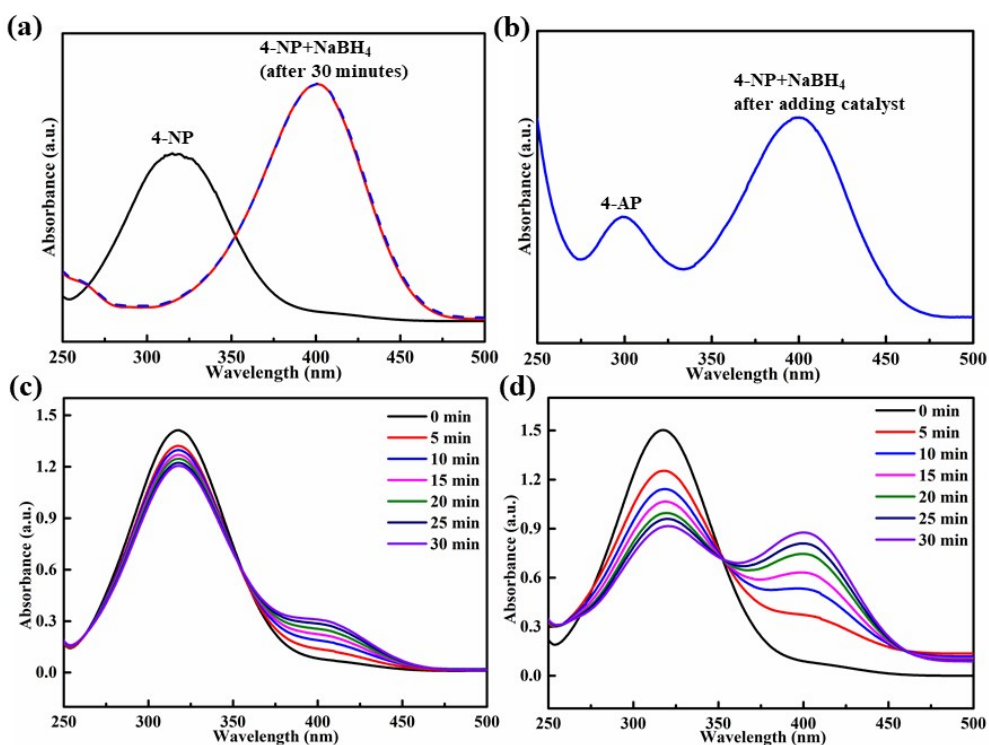

**Fig. S4** (a) Absorption peak of 4-NP (black) and after adding  $\text{NaBH}_4$  (red); (b) Absorption peak of 4-AP after adding catalyst; UV-vis spectrum with only (c) 0.1 mg and (d) 1 mg catalyst added.

**Table S2** Comparison of 4-NP reduction rate between Co/CoO@NC and some precious metal catalysts.

| Catalyst                                               | Concentration of 4-NP <sup>a</sup> (mmol/L) | Amount of catalyst <sup>b</sup> (mg) | Rate constant (s <sup>-1</sup> ) | References |
|--------------------------------------------------------|---------------------------------------------|--------------------------------------|----------------------------------|------------|
| Au/Fe <sub>3</sub> O <sub>4</sub> @SiO <sub>2</sub>    | 0.12                                        | 0.07                                 | 0.0013                           | 18 (a)     |
| Pt <sub>3</sub> Au <sub>1</sub> -PDA/RGO               | 0.09                                        | 0.06                                 | 0.0096                           | 18 (b)     |
| Ag <sub>20</sub> Ni <sub>80</sub> @CeO <sub>2</sub>    | 0.08                                        | 1.20                                 | 0.0110                           | 18 (c)     |
| Fe@SiO <sub>2</sub> /Au <sub>25</sub> Pt <sub>75</sub> | 0.20                                        | 0.30                                 | 0.0130                           | 18 (d)     |
| Co/CoO@NC                                              | 0.17                                        | 0.20                                 | 0.0139                           | this work  |

<sup>a</sup> The total 4-NP concentration of the reaction system.

<sup>b</sup> Average dosage of 3.0 mL 4-NP solution.

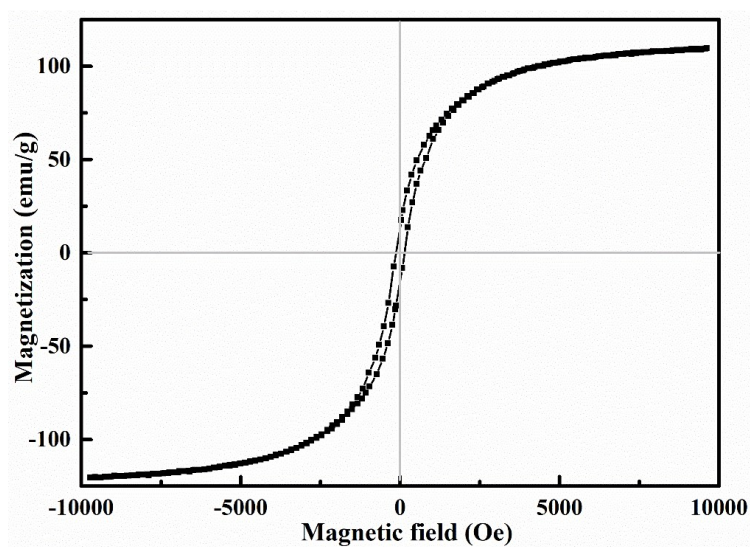

**Fig. S5** Magnetic hysteresis loop of Co/CoO@NC (298 K).

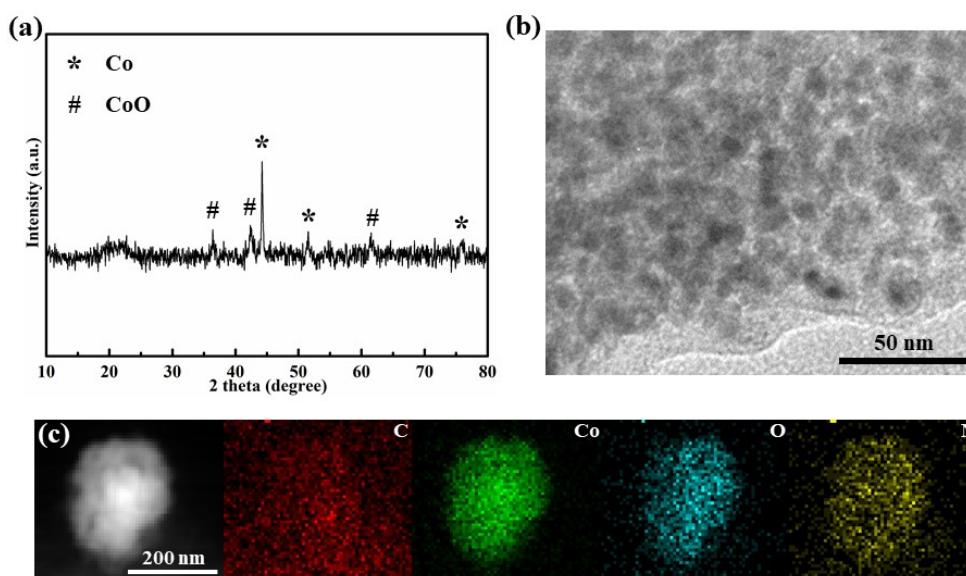

**Fig. S6** (a) XRD curve, (b) TEM picture and (c) EDX elemental mapping of Co/CoO@NC after five cycles experiment.
